# Supplementary material for: Antagonizing the metabolic hormone cholecystokinin (CCK) and its receptor CCKAR in the lung abolishes obesity-induced airway hyperresponsiveness
Source: Research Square preprint supplement (doi:10.21203/rs.3.rs-841619/v1), 2021-09-08
Supplement: Supplementary file 1 [file b02765e30c5ea6010a28b827.docx]

| tracking_id | gene_id | tss_id | locus | FPKM |
| --- | --- | --- | --- | --- |
|  |  |  |  |  |
| BDKRB2 | BDKRB2 | TSS15904 | chr14:96671134-96710666 | 91.0771 |
| GPR124 | GPR124 | TSS20121 | chr8:37654400-37707431 | 82.5985 |
| F2R | F2R | TSS11220 | chr5:76011867-76031595 | 74.9328 |
| GPR133 | GPR133 | TSS21901 | chr12:131438451-131626008 | 53.0235 |
| CCKAR | CCKAR | TSS15042 | chr4:26483017-26492042 | 49.6329 |
| GPR176 | GPR176 | TSS2714 | chr15:40092930-40213093 | 46.7417 |
| CCRL1 | CCRL1 | TSS20357,TSS24985 | chr3:132276981-132593050 | 41.992 |
| CXCR7 | CXCR7 | TSS27807 | chr2:237478379-237490994 | 33.3002 |
| F2RL2 | F2RL2 | TSS13749,TSS6218 | chr5:75699148-76003957 | 32.6355 |
| GLIPR2 | GLIPR2 | TSS27557 | chr9:36136741-36163903 | 32.02 |
| CHRM2 | CHRM2 | TSS16537,TSS4231,TSS5683,TSS7970,TSS8624 | chr7:136553398-136849088 | 29.7128 |
| GLIPR1 | GLIPR1 | TSS22611 | chr12:75874512-75905418 | 25.8561 |
| GPR108 | GPR108 | TSS21643 | chr19:6729924-6737633 | 25.2228 |
| FZD7 | FZD7 | TSS13101 | chr2:202899309-202903160 | 23.8696 |
| FZD2 | FZD2 | TSS19747 | chr17:42634811-42638630 | 20.2433 |
| FZD1 | FZD1 | TSS27526 | chr7:90893782-90898132 | 19.7195 |
| GPR107 | GPR107 | TSS25646 | chr9:132815984-132902448 | 18.5615 |
| PTGFR | PTGFR | TSS23248 | chr1:78956727-79006386 | 17.3505 |
| GPRC5B | GPRC5B | TSS7004 | chr16:19870292-19896151 | 14.751 |
| GPR137 | GPR137 | TSS15587,TSS17726,TSS23225,TSS25423 | chr11:64037299-64056972 | 13.7498 |
| BDKRB1 | BDKRB1 | TSS21118 | chr14:96722546-96731100 | 13.2884 |
| GPR172A | GPR172A | TSS21548,TSS28050,TSS2998 | chr8:145582216-145584948 | 12.6164 |
| TM7SF3 | TM7SF3 | TSS12027 | chr12:27124505-27167339 | 11.9126 |
| GPR137B | GPR137B | TSS10438 | chr1:236305831-236372209 | 11.8705 |
| FZD6 | FZD6 | TSS20186,TSS22367 | chr8:104310660-104345094 | 10.0788 |
| GPR153 | GPR153 | TSS7510 | chr1:6307405-6321035 | 9.6119 |
| FZD4 | FZD4 | TSS23321 | chr11:86656716-86666440 | 9.29699 |
| HRH1 | HRH1 | TSS19052,TSS24303,TSS6620,TSS9264 | chr3:11178778-11304939 | 8.43063 |
| P2RX4 | P2RX4 | TSS9268 | chr12:121647663-121671909 | 8.40913 |
| GPR161 | GPR161 | TSS16430 | chr1:168053996-168105624 | 8.3355 |
| CD97 | CD97 | TSS6578 | chr19:14491955-14519537 | 8.14483 |
| GPR125 | GPR125 | TSS18787 | chr4:22388998-22517672 | 6.64568 |
| GPRC5A | GPRC5A | TSS10189 | chr12:13043955-13066600 | 6.0685 |
| GPR1 | GPR1 | TSS6123 | chr2:207040041-207082771 | 5.71962 |
| GABBR1 | GABBR1 | TSS11540,TSS13357,TSS1576,TSS16075,TSS16491,TSS18040,TSS19364,TSS2312,TSS2355,TSS26029,TSS26602,TSS2707,TSS7448,TSS754 | chr6:29570004-29600962 | 5.26914 |
| RAI1 | RAI1 | TSS19609 | chr17:17584786-17740325 | 5.07959 |
| BAI2 | BAI2 | TSS17450 | chr1:32192717-32229648 | 5.01084 |
| PTGER4 | PTGER4 | TSS7272 | chr5:40680031-40693837 | 4.85337 |
| OPN3 | OPN3 | TSS162 | chr1:241695433-241803701 | 4.8463 |
| SMO | SMO | TSS5402 | chr7:128828712-128853385 | 4.73042 |
| GPR89A | GPR89A | TSS26883 | chr1:145764594-145827103 | 4.65535 |
| PTGER2 | PTGER2 | TSS15417 | chr14:52781015-52795322 | 4.63789 |
| EDNRB | EDNRB | TSS12723,TSS24089,TSS8880 | chr13:78469615-78549664 | 4.63395 |
| LGR4 | LGR4 | TSS1265 | chr11:27387507-27494334 | 4.19559 |
| GPR89B | GPR89B | TSS12321 | chr1:147400505-147465755 | 3.71404 |
| GPRASP2 | GPRASP2 | TSS11244 | chrX:101854095-101972661 | 3.61921 |
| GPR126 | GPR126 | TSS22593 | chr6:142623055-142767403 | 3.57682 |
| PTGER3 | PTGER3 | TSS24031 | chr1:71318035-71546972 | 3.47301 |
| GPR89C | GPR89C | TSS1032,TSS22541 | chr1:145883867-145924049 | 3.1011 |
| GPR162 | GPR162 | TSS620 | chr12:6930962-6936583 | 2.69106 |
| SSTR1 | SSTR1 | TSS22681 | chr14:38677203-38682268 | 2.62883 |
| HTR7P1 | HTR7P1 | TSS23735 | chr12:13153375-13157764 | 2.51078 |
| ADORA2B | ADORA2B | TSS21991 | chr17:15848230-15879210 | 2.48436 |
| OXTR | OXTR | TSS18517 | chr3:8792094-8811300 | 2.28825 |
| GPR75-ASB3 | GPR75-ASB3 | TSS22265 | chr2:53897116-54087170 | 2.16848 |
| MC1R | MC1R | TSS19727 | chr16:89984286-89987385 | 2.16023 |
| P2RX7 | P2RX7 | TSS20339,TSS27017 | chr12:121570621-121624354 | 2.04314 |
| EDNRA | EDNRA | TSS1245 | chr4:148402068-148466106 | 1.92455 |
| P2RY1 | P2RY1 | TSS11305 | chr3:152552735-152555843 | 1.83687 |
| PTGIR | PTGIR | TSS19026 | chr19:47123724-47128354 | 1.78658 |
| GPRASP1 | GPRASP1 | TSS10808,TSS7947 | chrX:101854095-101972661 | 1.75512 |
| GPR37 | GPR37 | TSS25665 | chr7:124386113-124405681 | 1.6224 |
| GPR68 | GPR68 | TSS25108,TSS8700 | chr14:91698875-91720224 | 1.56938 |
| TBXA2R | TBXA2R | TSS26976 | chr19:3594503-3606831 | 1.48326 |
| CCR10 | CCR10 | TSS25094 | chr17:40831419-40833845 | 1.38977 |
| AGTR1 | AGTR1 | TSS10496,TSS19229 | chr3:148415657-148460790 | 1.37023 |
| GPR173 | GPR173 | TSS7210 | chrX:53078505-53109796 | 1.29994 |
| P2RX6 | P2RX6 | TSS15680,TSS8148 | chr22:21369441-21382302 | 1.28335 |
| GPR155 | GPR155 | TSS22 | chr2:175296374-175351811 | 1.2397 |
| PTH1R | PTH1R | TSS22968,TSS23466 | chr3:46919235-46945289 | 1.23173 |
| GPR180 | GPR180 | TSS17611 | chr13:95254103-95286899 | 1.21939 |
| ADORA1 | ADORA1 | TSS7660 | chr1:203096835-203136533 | 1.15116 |
| OPRL1 | OPRL1 | TSS146,TSS18922 | chr20:62711470-62731996 | 1.07569 |
| CCRN4L | CCRN4L | TSS27899 | chr4:139936942-139967095 | 1.04152 |
| GPR135 | GPR135 | TSS6004 | chr14:59930239-59932059 | 0.844058 |
| ADRA2A | ADRA2A | TSS25014 | chr10:112836789-112840662 | 0.842078 |
| GPR56 | GPR56 | TSS16552,TSS25502,TSS27963 | chr16:57653909-57698944 | 0.723415 |
| GABBR2 | GABBR2 | TSS11675 | chr9:101050363-101471479 | 0.713211 |
| F2RL1 | F2RL1 | TSS27007 | chr5:76114832-76131140 | 0.711562 |
| GPRC5C | GPRC5C | TSS28191,TSS6407 | chr17:72427666-72443568 | 0.661979 |
| ADRA1B | ADRA1B | TSS18546 | chr5:159343739-159400017 | 0.651025 |
| LTB4R | LTB4R | TSS26864,TSS3948 | chr14:24774392-24787242 | 0.62234 |
| FZD8 | FZD8 | TSS13759 | chr10:35927176-35930362 | 0.597953 |
| GPR146 | GPR146 | TSS18801 | chr7:1036622-1177893 | 0.578975 |
| P2RY11 | P2RY11 | TSS1247 | chr19:10216898-10230599 | 0.540341 |
| GPR157 | GPR157 | TSS6057 | chr1:9164475-9189229 | 0.526146 |
| HTR2B | HTR2B | TSS5255 | chr2:231921577-232037540 | 0.484629 |
| HTR2B | HTR2B | TSS5255 | chr2:231921577-232037540 | 0.484629 |
| GPR4 | GPR4 | TSS15128 | chr19:46093022-46105466 | 0.439498 |
| ADRA1D | ADRA1D | TSS9239 | chr20:4201277-4229659 | 0.436219 |
| CCR7 | CCR7 | TSS22025 | chr17:38710021-38721736 | 0.428315 |
| GPR160 | GPR160 | TSS7866 | chr3:169755734-169803183 | 0.422801 |
| GPR137C | GPR137C | TSS16230 | chr14:53019865-53104431 | 0.395529 |
| PTGDR2 | PTGDR2 | TSS18528 | chr11:60609428-60623444 | 0.349219 |
| PTGER1 | PTGER1 | TSS23015 | chr19:14583277-14586174 | 0.340782 |
| CALCRL | CALCRL | TSS17119 | chr2:188207848-188313021 | 0.31648 |
| GPR85 | GPR85 | TSS10255,TSS1174,TSS20044 | chr7:112720467-112727833 | 0.302688 |
| C5AR1 | C5AR1 | TSS18038 | chr19:47813103-47825327 | 0.293195 |
| GPR35 | GPR35 | TSS11312,TSS12014 | chr2:241544824-241570676 | 0.286359 |
| CELSR3 | CELSR3 | TSS4478 | chr3:48673895-48700348 | 0.283246 |
| ADRB2 | ADRB2 | TSS1360 | chr5:148206155-148208197 | 0.27282 |
| LTB4R2 | LTB4R2 | TSS242 | chr14:24774392-24787242 | 0.263722 |
| P2RX5 | P2RX5 | TSS1330 | chr17:3539761-3599698 | 0.259111 |
| CELSR2 | CELSR2 | TSS27190 | chr1:109792640-109818378 | 0.25551 |
| GPR75 | GPR75 | TSS22265 | chr2:53897116-54087170 | 0.254858 |
| GPR39 | GPR39 | TSS16990 | chr2:133174146-133429070 | 0.249934 |
| GPR63 | GPR63 | TSS11869 | chr6:97241997-97285353 | 0.219425 |
| GPR17 | GPR17 | TSS13902 | chr2:128395995-128439360 | 0.188669 |
| P2RY14 | P2RY14 | TSS16142,TSS20981 | chr3:150804675-151176497 | 0.188383 |
| FZD9 | FZD9 | TSS25043 | chr7:72848108-72850450 | 0.182975 |
| GLIPR1L2 | GLIPR1L2 | TSS3716 | chr12:75784888-75817820 | 0.178153 |
| DRD4 | DRD4 | TSS21500 | chr11:637304-640705 | 0.139598 |
| ADORA2A | ADORA2A | TSS26182 | chr22:24823529-24890783 | 0.138636 |
| CCBP2 | CCBP2 | TSS26978 | chr3:42850963-42908775 | 0.129838 |
| FZD5 | FZD5 | TSS23229 | chr2:208627309-208634143 | 0.108118 |

Supplementary Table: List of non-olfactory GPCRs identified by RNA-seq in ASM cells. Table shows moderately to highly expressed GPCRs with FPKM ≥ 0.1.
